# Supplementary material for: Oxidation and adsorption of antimony(iii) from surface water using novel Al2O3-supported Fe–Mn binary oxide nanoparticles: effectiveness, dynamic quantitative mechanisms, and life cycle analysis
Source: Royal Society of Chemistry journal article supplement (doi:10.1039/d0en00609b), 2020-01-01
Supplement: d0en00609b1.pdf [file d0en00609b1.pdf]

**Supporting Information**

**Oxidation and adsorption of antimony(III) from surface water  
using a novel Al<sub>2</sub>O<sub>3</sub>-supported Fe-Mn binary oxides nanoparticles:  
Effectiveness, dynamic quantitative mechanisms, and life cycle  
analysis**

Yang Bai, Fan Wu, Yanyan Gong\*

*Guangdong Key Laboratory of Environmental Pollution and Health, School of Environment,  
Jinan University, Guangzhou 511443, China*

\*Corresponding author. E-mail address: yanyangong@jnu.edu.cn (Y. Gong).

## Content

**Section S1.** Preparation of Fe-Mn@Al<sub>2</sub>O<sub>3</sub>

**Section S2.** Sorption kinetic models

**Section S3.** Sorption isotherm models

**Section S4.** Calculation of the total oxidation efficiency of Fe-Mn@Al<sub>2</sub>O<sub>3</sub> and Fe-Mn+Al<sub>2</sub>O<sub>3</sub> towards Sb(III)

**Table S1** Fe:Mn molar ratios and Fe:Al<sub>2</sub>O<sub>3</sub> molar ratios of different Fe-Mn@Al<sub>2</sub>O<sub>3</sub>

**Table S2** The specific surface area, pore size, and pore volume of Fe-Mn, Al<sub>2</sub>O<sub>3</sub>, and Fe-Mn@Al<sub>2</sub>O<sub>3</sub> with different Fe:Al<sub>2</sub>O<sub>3</sub> molar ratios

**Table S3** Preparation costs of Fe-Mn@Al<sub>2</sub>O<sub>3</sub> with different Fe:Al<sub>2</sub>O<sub>3</sub> molar ratios

**Table S4** Pseudo-first-order, pseudo-second-order, intraparticle diffusion model, and external mass transfer models applied for simulating Sb sorption kinetics and the corresponding fitting parameters

**Table S5** Regression parameters of sorption isotherm data of Sb onto Fe-Mn@Al<sub>2</sub>O<sub>3</sub> by Langmuir and Freundlich models

**Table S6** XPS result of Fe-Mn@Al<sub>2</sub>O<sub>3</sub> before and after adsorption of Sb(III).

**Table S7** Concentrations of different Sb species on Fe-Mn@Al<sub>2</sub>O<sub>3</sub> and in aqueous at different time intervals

**Fig. S1** The actual contents of Fe, Mn, and Al in Fe-Mn@Al<sub>2</sub>O<sub>3</sub> by EDS.

**Fig. S2** The environmental impact contributions of all material and energy inputs with various Fe:Al<sub>2</sub>O<sub>3</sub> molar ratios.

**Fig. S3** Effects of Fe-Mn@ Al<sub>2</sub>O<sub>3</sub> dosage on total Sb adsorption.

**Fig. S4** Net electric charges of Fe-Mn@Al<sub>2</sub>O<sub>3</sub> as a function of pH.

**Fig. S5** The ratios of Mn species (Mn(II), Mn(III), and Mn(IV)) to total Mn over reaction.

### **Section S1. Preparation of Fe-Mn@Al<sub>2</sub>O<sub>3</sub>**

In brief, under vigorous magnetic stirring and N<sub>2</sub> purging, 40 mL FeSO<sub>4</sub> solution (0.05 mol/L) was added into 300 mL deionized water with 0.41 g of Al<sub>2</sub>O<sub>3</sub>. After mixing for 10 min, 40 mL of KMnO<sub>4</sub> solution (0.0167 mol/L) was added dropwise into the mixture under vigorous stirring. Then, a 5 mol/L NaOH solution was added till a pH value of 7–8. The suspension was continuously stirred for 1 h, and sealed and aged in dark for 12 h to ensure complete reaction and full growth of the particles. Finally, the solids settled by gravity were washed three times with deionized water and vacuum-dried in a freeze drier (SCIENTZ-10N, Ningbo, China) at -40 °C. The resultant composite contained 0.22 g Fe-Mn binary oxides and 0.41 g alumina oxide (i.e., a Fe:Al<sub>2</sub>O<sub>3</sub> molar ratio of 1:2). The amounts of Al<sub>2</sub>O<sub>3</sub> added in the system were changed to 0.20 g, 0.82 g, and 2.00 g under otherwise identical conditions to prepare Fe-Mn@Al<sub>2</sub>O<sub>3</sub> with a Fe:Al<sub>2</sub>O<sub>3</sub> molar ratio of 1:1, 1:4, and 1:10, respectively.

## Section S2. Sorption kinetic models

Several kinetic models are applied to simulate the Sb sorption kinetic data. The commonly used pseudo-first-order (**equation 1**) and pseudo-second-order kinetic models (**equation 2**)<sup>1</sup> are given as follows:

$$\ln(q_e - q_t) = \ln q_e - K_1 t \quad (1)$$

$$\frac{t}{q_t} = \frac{1}{K_2 q_e^2} + \frac{t}{q_e} \quad (2)$$

where  $q_t$  (mg/g) and  $q_e$  (mg/g) are the sorbed amounts of Sb at time  $t$  (h) and equilibrium, respectively, and  $K_1$  ( $\text{h}^{-1}$ ) and  $K_2$  ( $\text{g}/(\text{mg}\cdot\text{h})$ ) are pseudo-first-order and pseudo-second-order sorption rate constants, respectively.

The Weber and Morris intraparticle diffusion model is based on Fick's second law of diffusion and described by **equation 3**:<sup>2</sup>

$$q_t = k_i t^{0.5} + C_i \quad (3)$$

where  $k_i$  is the intraparticle diffusion rate constant ( $\text{mg}/(\text{g}\cdot\text{h}^{0.5})$ ) and  $C_i$  is the intercept related to the boundary layer effect (mg/g). The values of  $K_i$  and  $C_i$  can be obtained from the slope and intercept of the linear plots of  $q_t$  versus  $t^{0.5}$ .

The external mass transfer model is described by **equation 4**:<sup>3</sup>

$$-\frac{dC}{dt} = k_f a (C - C_s) \quad (4)$$

where  $k_f$  is the mass transfer coefficient (cm/s),  $C$  and  $C_s$  are the concentration of Sb in bulk solution and at interface (mg/L), respectively, and  $a$  ( $\text{m}^2/\text{m}^3$ ) is the specific area available for mass transfer per unit volume of the contactor ( $2.26 \times 10^5 \text{ m}^2/\text{m}^3$ );

Assume the antimony sorption fits linear isotherm (**equation 5**):

$$q_e = \frac{q_m k C_s}{1 + C_s} \quad (5)$$

where  $k$  is the sorption equilibrium coefficient,  $q_m$  is the maximum sorption capacity of Fe-Mn@Al<sub>2</sub>O<sub>3</sub> (mg/g), and  $q_e$  is the adsorption capacity which can be calculated by the following **equation 6**:

$$q_e = \frac{V}{m}(C_0 - C_s) \quad (6)$$

where  $V$  is the contactor volume (0.05 L),  $m$  is the mass of Fe-Mn@Al<sub>2</sub>O<sub>3</sub>, and  $C_0$  is the initial Sb concentration in bulk solution (mg/L). Combine equations 4-6, yielding **equation 7**:

$$-\frac{dc}{dt} = k_f a \left[ C - \frac{1}{2} \left( \sqrt{\left( \frac{q_m m}{V} - C_0 + \frac{1}{k} \right)^2 + \frac{4C_0}{k}} - \frac{q_m m}{V} + C_0 - \frac{1}{k} \right) \right] \quad (7)$$

To describe the sorption data with the model, the concentration of Sb in the bulk solution ( $C$ ) is derived as a function of time ( $t$ ):

$$C = b \exp[-ht] + C_0 - b \quad (8)$$

In equation 8,  $h$  and  $b$  are the fitting parameters of the external mass transfer model:  $h = k_f a$

$$\text{and } b = C_0 - \frac{1}{2} \left( \sqrt{\left( \frac{q_m m}{V} - C_0 + \frac{1}{k} \right)^2 + \frac{4C_0}{k}} - \frac{q_m m}{V} + C_0 - \frac{1}{k} \right)$$

Thus equation 8 is applied to fit the experimental results with  $h$  and  $b$  as fitting parameters.

### Section S3. Sorption isotherm models

Langmuir (**equation 9**) and Freundlich (**equation 10**) models were applied to fit the sorption isotherm data.

$$q_e = \frac{q_m K_L C_e}{1 + K_L C_e} \quad (9)$$

$$q_e = K_F C_e^{\frac{1}{n}} \quad (10)$$

where  $q_e$  and  $C_e$  represents the equilibrium Sb uptake (mg/g) and the equilibrium concentration of Sb in the solution (mg/L), respectively,  $q_m$  is the maximum adsorption capacity of Fe-Mn@Al<sub>2</sub>O<sub>3</sub> (mg/g),  $K_L$  is the Langmuir constant (mg/L),  $K_F$  is the Freundlich affinity coefficient ((mg/g)/(mg/L)<sup>n</sup>), and  $n$  is the exponential coefficient.

#### Section S4. The total oxidation efficiencies of Fe-Mn@Al<sub>2</sub>O<sub>3</sub> and Fe-Mn+Al<sub>2</sub>O<sub>3</sub> towards Sb(III)

The total oxidation efficiencies of Fe-Mn@ Al<sub>2</sub>O<sub>3</sub> and Fe-Mn+Al<sub>2</sub>O<sub>3</sub> towards Sb(III) are calculated based on mass balance.

- (1) Reaction conditions: Initial Sb(III) concentration = Total Sb concentration = 5000 µg/L, solution volume = 50 mL, Fe-Mn@Al<sub>2</sub>O<sub>3</sub> = 100 mg/L, Fe-Mn+Al<sub>2</sub>O<sub>3</sub> = 100 mg/L (Fe-Mn = 33 mg/L and Al<sub>2</sub>O<sub>3</sub> = 67 mg/L), and initial solution pH = 6.4.
- (2) Equilibrium aqueous Sb(III) concentration = 242.4 µg/L for Fe-Mn@ Al<sub>2</sub>O<sub>3</sub> and 587.7 µg/L for Fe-Mn+Al<sub>2</sub>O<sub>3</sub>.
- (3) The Sb-laden Fe-Mn@Al<sub>2</sub>O<sub>3</sub> and Sb-laden Fe-Mn+Al<sub>2</sub>O<sub>3</sub> were collected at the end of the experiment, the sample was gently rinsed twice with deionized water to remove soluble Sb, dissolved in 50 mL of 9.6 mol/L HCl solution, and analyzed for aqueous Sb(III) concentrations. Dissolved Sb(III) concentration = 235.1 µg/L for Fe-Mn@Al<sub>2</sub>O<sub>3</sub> and 523.4 µg/L for Fe-Mn+Al<sub>2</sub>O<sub>3</sub>.
- (4) The initial total Sb = 5000 µg/L × 0.05 L = 250 µg  
For Fe-Mn@Al<sub>2</sub>O<sub>3</sub>, the Sb(III) content after reaction = (242.4+235.1) µg/L × 0.05 L = 23.88 µg  
For Fe-Mn+Al<sub>2</sub>O<sub>3</sub>, the Sb(III) content after reaction = (587.7+523.4) µg/L × 0.05 L = 55.55 µg
- (5) For Fe-Mn@Al<sub>2</sub>O<sub>3</sub>, the total oxidation efficiency towards Sb(III) = (250 µg - 23.88 µg) / 250 µg × 100% = 90.4%  
For Fe-Mn+Al<sub>2</sub>O<sub>3</sub>, the total oxidation efficiency towards Sb(III) = (250 µg - 55.55 µg) / 250 µg × 100% = 77.8%



Therefore, till equilibrium, the total oxidation efficiency towards Sb(III) was 90.4% for Fe-Mn@Al<sub>2</sub>O<sub>3</sub> and 77.8% for Fe-Mn+Al<sub>2</sub>O<sub>3</sub>.

**Table S1** Molar ratios of Fe:Mn and Fe:Al<sub>2</sub>O<sub>3</sub> for different types of Fe-Mn@Al<sub>2</sub>O<sub>3</sub>.

| Composites                                  | Fe:Mn molar ratios |               | Fe:Al <sub>2</sub> O <sub>3</sub> molar ratios |               |
|---------------------------------------------|--------------------|---------------|------------------------------------------------|---------------|
|                                             | Theoretical        | Measured      | Theoretical                                    | Measured      |
|                                             | values             | values        | values                                         | values        |
| Fe-Mn                                       |                    | (2.83±0.02):1 |                                                |               |
| Fe-Mn@Al <sub>2</sub> O <sub>3</sub> (1:1)  |                    | (2.96±0.06):1 | 1:1                                            | 1:(1.05±0.01) |
| Fe-Mn@Al <sub>2</sub> O <sub>3</sub> (1:2)  | 3:1                | (2.91±0.12):1 | 1:2                                            | 1:(1.92±0.13) |
| Fe-Mn@Al <sub>2</sub> O <sub>3</sub> (1:4)  |                    | (2.85±0.02):1 | 1:4                                            | 1:(4.18±0.18) |
| Fe-Mn@Al <sub>2</sub> O <sub>3</sub> (1:10) |                    | (2.89±0.09):1 | 1:10                                           | 1:(9.78±0.09) |

**Table S2** Specific surface areas, pore sizes, and pore volumes of Fe-Mn, Al<sub>2</sub>O<sub>3</sub>, and Fe-Mn@Al<sub>2</sub>O<sub>3</sub> at different Fe:Al<sub>2</sub>O<sub>3</sub> molar ratios.

| Composites                                 | Specific surface area (m <sup>2</sup> /g) | Pore volume (cm <sup>3</sup> /g) | Pore size (nm) |
|--------------------------------------------|-------------------------------------------|----------------------------------|----------------|
| Al <sub>2</sub> O <sub>3</sub>             | 265.53                                    | 0.493                            | 9.34           |
| Fe-Mn                                      | 208.54                                    | 0.419                            | 7.44           |
| Fe-Mn@Al <sub>2</sub> O <sub>3</sub> (1:1) | 230.84                                    | 0.486                            | 8.09           |
| Fe-Mn@Al <sub>2</sub> O <sub>3</sub> (1:2) | 225.88                                    | 0.471                            | 8.16           |
| Fe-Mn@Al <sub>2</sub> O <sub>3</sub> (1:4) | 221.16                                    | 0.464                            | 8.39           |

**Table S3** Preparation costs of Fe-Mn@Al<sub>2</sub>O<sub>3</sub> with different Fe:Al<sub>2</sub>O<sub>3</sub> molar ratios.

| Fe:Al <sub>2</sub> O <sub>3</sub> molar ratios | Preparation costs <sup>a</sup> (CNY/t) |
|------------------------------------------------|----------------------------------------|
| 1:0                                            | 8715                                   |
| 1:1                                            | 5957                                   |
| 1:2                                            | 5038                                   |
| 1:4                                            | 4303                                   |
| 1:10                                           | 3701                                   |

<sup>a</sup> The preparation cost was calculated based on the precursor (industrial grade) costs without considering the operational expenses. The market price was 3200 CNY/t for Al<sub>2</sub>O<sub>3</sub> (98.6%), 410 CNY/t for FeSO<sub>4</sub>·7H<sub>2</sub>O (98.0%), and 15000 CNY/T for KMnO<sub>4</sub> (99.3%).

**Table S4** Pseudo-first-order, pseudo-second-order, intraparticle diffusion, and external mass transfer models applied for simulating total Sb sorption kinetics and the corresponding fitting parameters (Errors given as standard deviation).

| <b>Kinetic models</b>         | <b>Parameters</b>                            |                                    |                                | <b>R<sup>2</sup></b> | <b>ARE<sup>i</sup></b> | <b>NSD<sup>i</sup></b> |
|-------------------------------|----------------------------------------------|------------------------------------|--------------------------------|----------------------|------------------------|------------------------|
| Pseudo-first-order model      | $K_1^a$ (h <sup>-1</sup> )                   | $q_e^b$ (mg/g)                     | $h_1^c = K_1 q_e$ (mg/(g·h))   | 0.9524               | 25.09                  | 52.91                  |
|                               | 0.1386±0.0117                                | 1.32±0.36                          | 0.1829                         |                      |                        |                        |
| Pseudo-second-order model     | $K_2^a$ (g/(mg·h))                           | $q_e^b$ (mg/g)                     | $h_2^c = K_2 q_e^2$ (mg/(g·h)) | 0.9997               | 12.11                  | 23.07                  |
|                               | 0.7140±0.1871                                | 8.09±0.06                          | 46.73                          |                      |                        |                        |
| Intraparticle diffusion model | First stage (0-10 min)                       | $k_1^d$ (mg/(g·h <sup>0.5</sup> )) | $C_1^e$ (mg/g)                 | 1.0000               | 0.02                   | 0.02                   |
|                               |                                              | 21.1748±0.000                      | 0                              |                      |                        |                        |
|                               | Second stage (10 min-4 h)                    | $k_2^d$ (mg/(g·h <sup>0.5</sup> )) | $C_2^e$ (mg/g)                 | 0.9918               | 2.85                   | 2.95                   |
|                               |                                              | 0.4785±0.0217                      | 6.49±0.04                      |                      |                        |                        |
|                               | Third stage (4-24 h)                         | $k_3^d$ (mg/(g·h <sup>0.5</sup> )) | $C_3^e$ (mg/g)                 | 0.9639               | 4.95                   | 4.82                   |
|                               |                                              | 0.1110±0.0215                      | 7.50±0.08                      |                      |                        |                        |
| External mass transfer model  | $k_f^f = h/a^g$ (cm/s)                       | $h^h$ (1/h)                        | $b^h$ (μg/L)                   | 0.9285               | 11.88                  | 15.76                  |
|                               | 1.49×10 <sup>-6</sup> ±0.52×10 <sup>-6</sup> | 0.3380±0.1179                      | 924.21±104.94                  |                      |                        |                        |

<sup>a</sup>  $K_1$  ( $\text{h}^{-1}$ ) is the rate constant of the pseudo-first-order sorption,  $K_2$  ( $\text{g}/(\text{mg}\cdot\text{h})$ ) is the pseudo-second-order sorption rate constant. <sup>b</sup>  $q_e$  ( $\text{mg}/\text{g}$ ) is Sb uptake at equilibrium time. <sup>c</sup>  $h_1$  ( $\text{mg}/(\text{g}\cdot\text{h})$ ) and  $h_2$  ( $\text{mg}/(\text{g}\cdot\text{h})$ ) are the initial rate of the pseudo-first-order sorption and the initial rate of the pseudo-second-order sorption, respectively. <sup>d</sup>  $k_i$  ( $\text{mg}/(\text{g}\cdot\text{h}^{0.5})$ ) is the intraparticle diffusion rate constant. <sup>e</sup>  $C_i$  is the intercept related to the boundary layer effect ( $\text{mg}/\text{g}$ ). <sup>f</sup>  $k_f$  ( $\text{cm}/\text{s}$ ) is the mass transfer coefficient. <sup>g</sup>  $a$  ( $\text{m}^2/\text{m}^3$ ) is the specific surface area available for mass transfer per unit volume of the contactor ( $2.26\times 10^5 \text{ m}^2/\text{m}^3$ ). <sup>h</sup>  $h$  ( $1/\text{h}$ ) and  $b$  ( $\text{mg}/\text{L}$ ) are the fitting parameters of the external mass transfer model. <sup>i</sup> The normalized standard deviation (NSD) and average relative error (ARE) were calculated to indicate the validity of kinetic models, which are defined as:

$$NSD = 100 \sqrt{\frac{1}{N-1} \sum_{i=1}^N \left| \frac{(q_{ii}^{\text{exp}} - q_{ii}^{\text{cal}})}{q_{ii}^{\text{exp}}} \right|^2}$$

$$ARE = \frac{100}{N} \sum_{i=1}^N \left| \frac{(q_{ii}^{\text{exp}} - q_{ii}^{\text{cal}})}{q_{ii}^{\text{exp}}} \right|$$

where  $q_{ii}^{\text{exp}}$  and  $q_{ii}^{\text{cal}}$  ( $\text{mg}/\text{g}$ ) are experimental values and calculated values by models of Sb uptake at time  $t$ , and  $N$  is the number of measurements.

**Table S5** Regression parameters of sorption isotherm data of Sb onto Fe-Mn@Al<sub>2</sub>O<sub>3</sub> by Langmuir and Freundlich models (Errors given as standard deviation).

| Adsorption isotherm | Sb species | Parameters                            |              | R <sup>2</sup> | MPSD <sup>e</sup> | HYBRID <sup>e</sup> |
|---------------------|------------|---------------------------------------|--------------|----------------|-------------------|---------------------|
|                     |            | $q_m^a$ (mg/g)                        | $b^b$ (L/mg) |                |                   |                     |
| Langmuir            | Sb(III)    | 272.22±33.33                          | 0.09±0.03    | 0.9862         | 52.10             | 1239.88             |
|                     | Sb(V)      | 66.68±13.34                           | 0.04±0.01    | 0.9200         | 64.53             | 1676.06             |
|                     |            | $K_F^c$ ((mg/g)/(mg/L) <sup>n</sup> ) | $n^d$        |                |                   |                     |
| Freundlich          | Sb(III)    | 29.23±3.05                            | 0.56±0.03    | 0.9909         | 74.69             | 371.97              |
|                     | Sb(V)      | 7.69±0.75                             | 0.42±0.02    | 0.9856         | 24.79             | 135.49              |

<sup>a</sup>  $q_m$  is the Langmuir maximum sorption capacity (mg/g). <sup>b</sup>  $b$  is the Langmuir affinity constant (L/mg). <sup>c</sup>  $K_F$  is the Freundlich affinity coefficient ((mg/g)/(mg/L)<sup>n</sup>). <sup>d</sup>  $n$  is the exponential coefficient. <sup>e</sup> The Marquardt's percent standard deviation (MPSD) and hybrid error function (HYBRID) indicated the validity of adsorption isotherm:

$$\text{MPSD} = 100 \sqrt{\frac{1}{N-P} \sum_{i=1}^N \left( \frac{q_{ti}^{\text{exp}} - q_{ti}^{\text{cal}}}{q_{ti}^{\text{exp}}} \right)^2}$$

$$\text{HYBRID} = \frac{100}{N-P} \sum_{i=1}^N \left| \frac{(q_{ti}^{\text{exp}} - q_{ti}^{\text{cal}})^2}{q_{ti}^{\text{exp}}} \right|$$

where  $q_{ti}^{\text{exp}}$  is the experimental data obtained from batch sorption tests (mg/g), and  $q_{ti}^{\text{cal}}$  is the estimated value from the isotherm for corresponding  $q_{ti}^{\text{exp}}$  (mg/g),  $N$  is the number of observations in the experimental sorption isotherm, and  $P$  is the number of parameters in the regression model.



**Table S6** XPS results of Fe-Mn@Al<sub>2</sub>O<sub>3</sub> before and after sorption of Sb(III).

| Sample                                                            | Composition (at.%) |      |      |     |     |
|-------------------------------------------------------------------|--------------------|------|------|-----|-----|
|                                                                   | Al                 | O    | Fe   | Mn  | Sb  |
| Fe-Mn@Al <sub>2</sub> O <sub>3</sub>                              | 9.1                | 65.2 | 19.6 | 6.1 | 0   |
| Sb laden Fe-Mn@Al <sub>2</sub> O <sub>3</sub> <sup>a</sup> (1 h)  | 9.2                | 60.2 | 19.6 | 5.6 | 5.4 |
| Sb laden Fe-Mn@Al <sub>2</sub> O <sub>3</sub> <sup>a</sup> (4 h)  | 9.2                | 59.9 | 20.0 | 5.2 | 5.7 |
| Sb laden Fe-Mn@Al <sub>2</sub> O <sub>3</sub> <sup>a</sup> (8 h)  | 9.6                | 60.1 | 20.1 | 4.6 | 5.5 |
| Sb laden Fe-Mn@Al <sub>2</sub> O <sub>3</sub> <sup>a</sup> (48 h) | 9.7                | 59.6 | 20.3 | 4.2 | 5.5 |

Note: Sb-laden Fe-Mn@Al<sub>2</sub>O<sub>3</sub> were prepared under the following experimental conditions: Fe-Mn@Al<sub>2</sub>O<sub>3</sub> = 100 mg/L, Sb(III) concentration = 5 mg/L, pH = 6.4, and reaction time = 1 h, 4 h, 8 h, and 48 h, respectively.

**Table S7** Concentrations of different Sb species on Fe-Mn@Al<sub>2</sub>O<sub>3</sub> and in aqueous phase at different time intervals.<sup>a</sup>

| Time (h) | S <sub>Sb(total)</sub> <sup>a</sup> (μg/L) | S <sub>Sb(III)</sub> <sup>a</sup> (μg/L) | S <sub>Sb(V)</sub> <sup>a</sup> (μg/L) | C <sub>Mn(II)</sub> <sup>b</sup> (μg/L) | C <sub>Sb(total)</sub> <sup>b</sup> (μg/L) | C <sub>Sb(III)</sub> <sup>b</sup> (μg/L) | C <sub>Sb(V)</sub> <sup>b</sup> (μg/L) |
|----------|--------------------------------------------|------------------------------------------|----------------------------------------|-----------------------------------------|--------------------------------------------|------------------------------------------|----------------------------------------|
| 0        |                                            | -                                        | -                                      | -                                       | 5006.7                                     | 4954.0                                   | -                                      |
| 1        | 2465.1                                     | 522.4                                    | 1942.7                                 | 536.3                                   | 2461.9                                     | 1925.0                                   | 536.9                                  |
| 4        | 3389.6                                     | 442.7                                    | 2966.9                                 | 979.1                                   | 1558.6                                     | 768.8                                    | 789.8                                  |
| 8        | 3315.0                                     | 406.8                                    | 2908.2                                 | 1181.8                                  | 1593.1                                     | 506.9                                    | 1086.2                                 |
| 48       | 2833.5                                     | 235.1                                    | 2598.4                                 | 1456.8                                  | 2045.4                                     | 242.4                                    | 1803.0                                 |

<sup>a</sup> Sb-laden Fe-Mn@Al<sub>2</sub>O<sub>3</sub> at different time were dissolved in 50 mL 9.6 mol/L HCl solution and analyzed for aqueous Sb species. <sup>b</sup> S<sub>Sb(total)</sub>, S<sub>Sb(III)</sub>, and S<sub>Sb(V)</sub> are contents of Sb adsorbed onto Fe-Mn@Al<sub>2</sub>O<sub>3</sub>. <sup>c</sup> C<sub>Mn(II)</sub>, C<sub>Sb(total)</sub>, C<sub>Sb(III)</sub>, and C<sub>Sb(V)</sub> are concentrations of Mn(II), total Sb, Sb(III), and Sb(V) in aqueous phase at different reaction times, respectively.

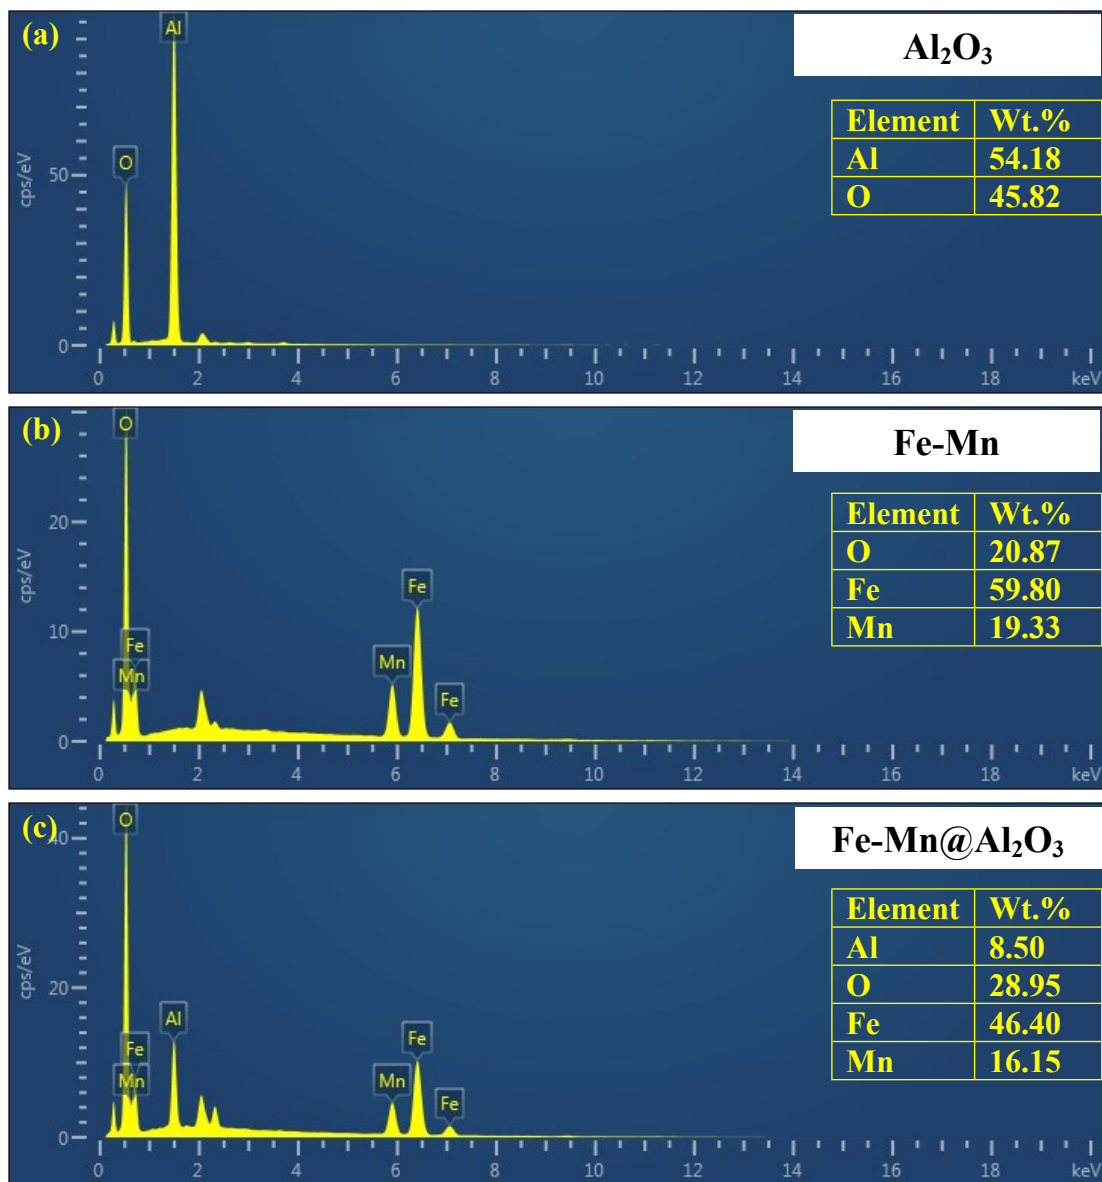

**Fig. S1** SEM-EDS spectra of (a) Al<sub>2</sub>O<sub>3</sub>, (b) Fe-Mn, and (c) Fe-Mn@Al<sub>2</sub>O<sub>3</sub> (a Fe:Al<sub>2</sub>O<sub>3</sub> molar ratio = 1:2).

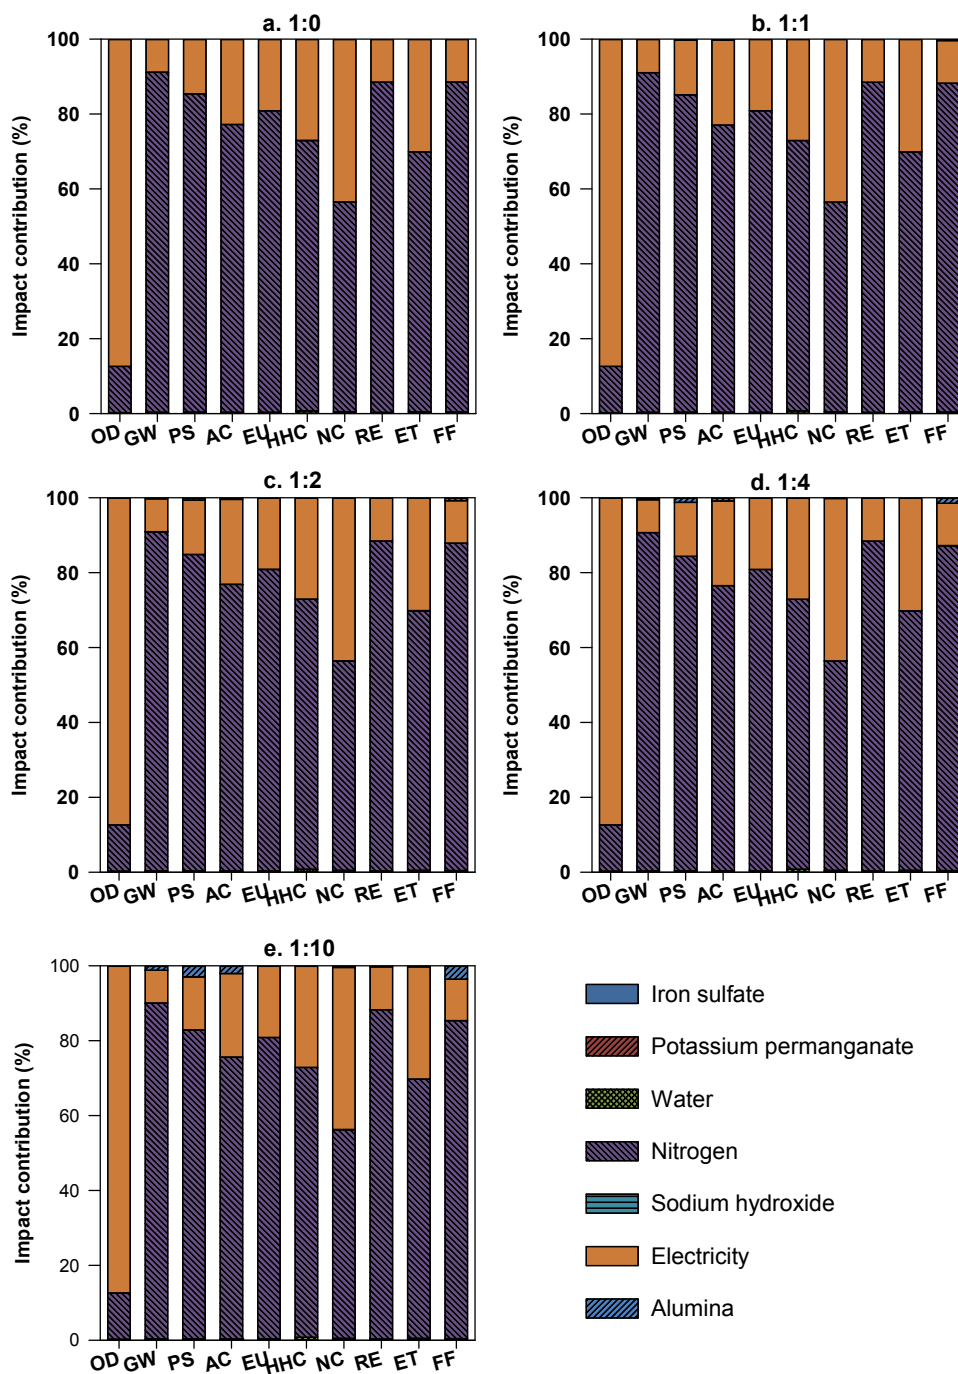

**Fig. S2** The environmental impact contributions of all materials and energy inputs for Fe-Mn@Al<sub>2</sub>O<sub>3</sub> with various Fe:Al<sub>2</sub>O<sub>3</sub> molar ratios: (a) 1:0, (b) 1:1, (c) 1:2, (d) 1:4, and (e) 1:10. Potential impact categories are ozone depletion (OD), global warming (GW), smog (PS), acidification (AC), eutrophication (EU), carcinogenic (HHC), noncarcinogenic (NC), respiratory effects (RE), ecotoxicity (ET), and fossil fuel depletion (FF).

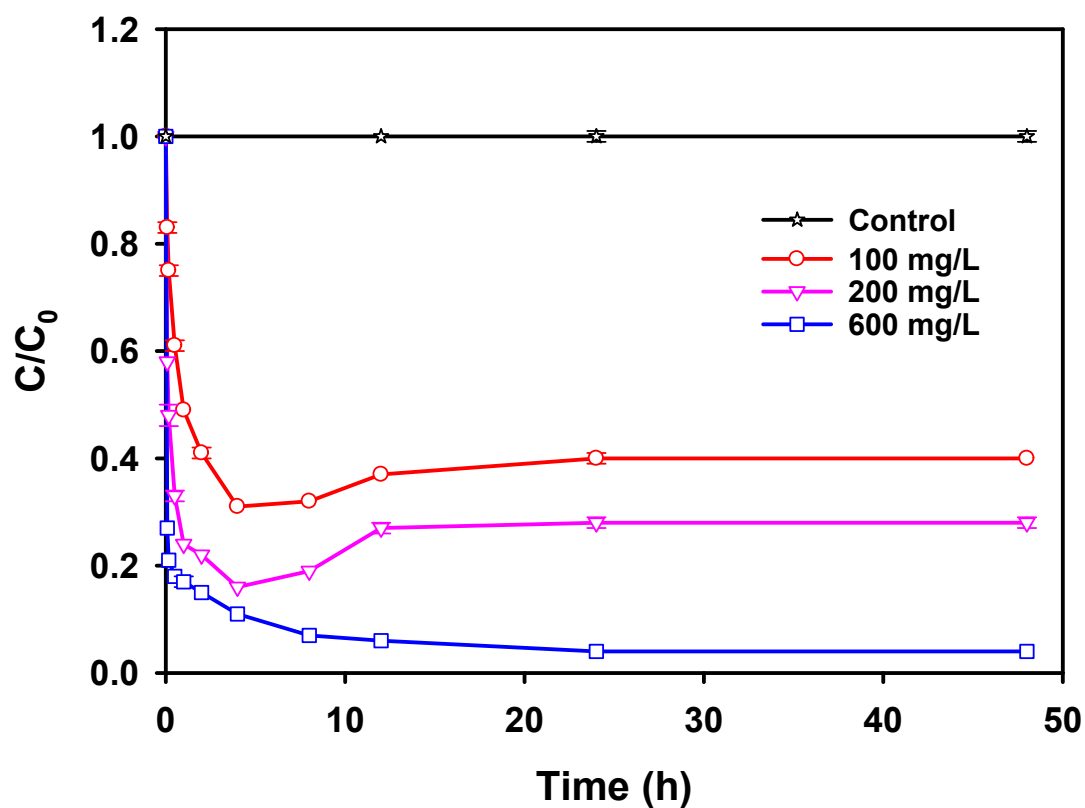

**Fig. S3** Effects of Fe-Mn@Al<sub>2</sub>O<sub>3</sub> dosage on total Sb removal from simulated surface water. Experimental conditions: Initial Sb(III) concentration = 5 mg/L, Fe-Mn@Al<sub>2</sub>O<sub>3</sub> (Fe:Al<sub>2</sub>O<sub>3</sub> molar ratio = 1:2) = 100 mg/L, 200 mg/L, and 600 mg/L, reaction volume = 50 mL, pH = 6.4, and equilibrium time = 48 h. Data plotted as mean of triplicates and error bars (calculated as standard deviation) indicate data reproducibility.

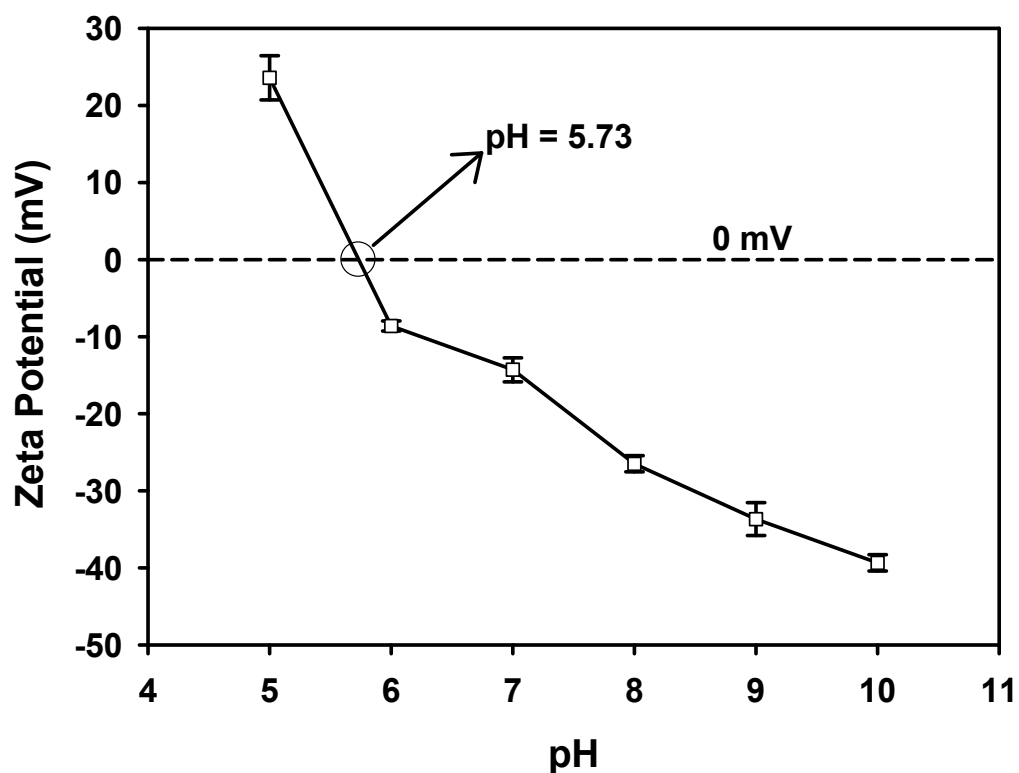

**Fig. S4** Net electric charges of Fe-Mn@Al<sub>2</sub>O<sub>3</sub> as a function of pH. Experimental conditions: Fe-Mn@Al<sub>2</sub>O<sub>3</sub> (Fe:Al<sub>2</sub>O<sub>3</sub> molar ratio = 1:2) = 100 mg/L, reaction volume = 50 mL, pH = 5.0, 6.0, 7.0, 8.0, 9.0, and 10.0. Data plotted as mean of triplicates and error bars (calculated as standard deviation) indicate data reproducibility.

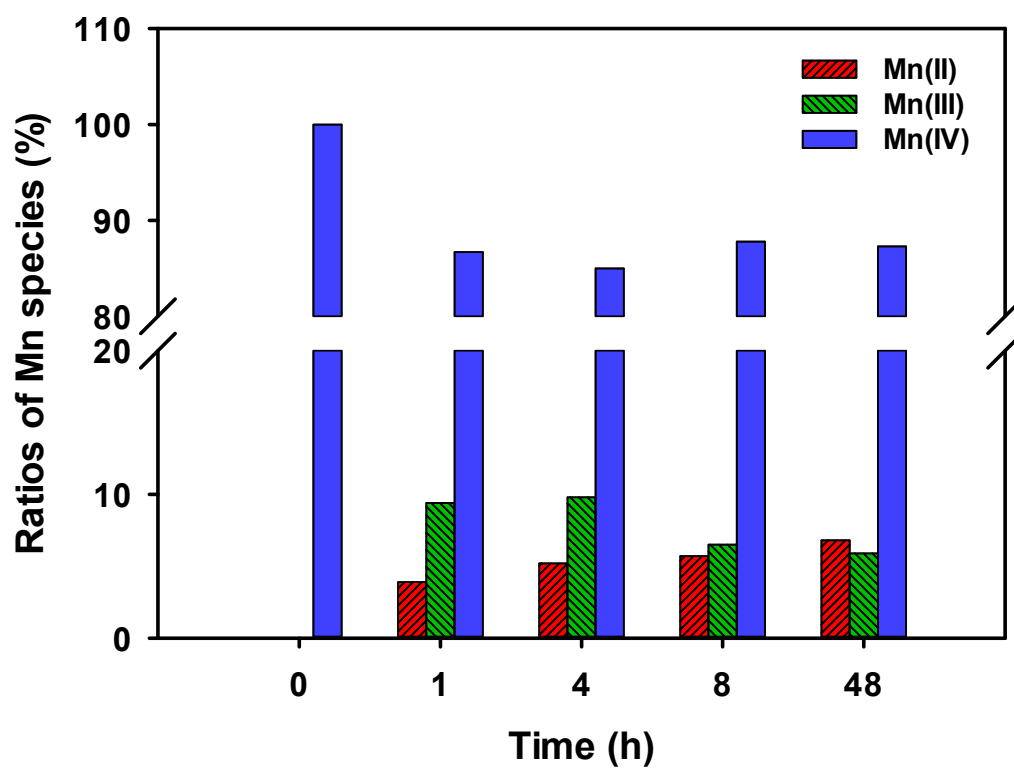

**Fig. S5** The ratios of Mn species (Mn(II), Mn(III), and Mn(IV)) to total Mn over reaction.

## Notes and references

- 1 Y. Huang, S. Xia, J. Lyu and J. Tang, Highly efficient removal of aqueous  $\text{Hg}^{2+}$  and  $\text{CH}_3\text{Hg}^+$  by selective modification of biochar with 3-mercaptopropyltrimethoxysilane, *Chem. Eng. J.*, 2019, **360**, 1646-1655.
- 2 F.-C. Wu, R.-L. Tseng and R.-S. Juang, Initial behavior of intraparticle diffusion model used in the description of adsorption kinetics, *Chem. Eng. J.*, 2009, **153**(1), 1-8.
- 3 J. Luo, X. Luo, J. Crittenden, J. Qu, Y. Bai, Y. Peng and J. Li, Removal of antimonite (Sb(III)) and antimonate (Sb(V)) from aqueous solution using carbon nanofibers that are decorated with zirconium oxide ( $\text{ZrO}_2$ ), *Environ. Sci. Technol.*, 2015, **49**(18), 11115-11124.
